# Supplementary material
Source: Springer Nature journal article supplement (https://www.springermedizin.de/resource/supplementary/12992_2011_148_MOESM5_ESM.pdf/9616648)
Supplement: MOESM5 [file 9616648]

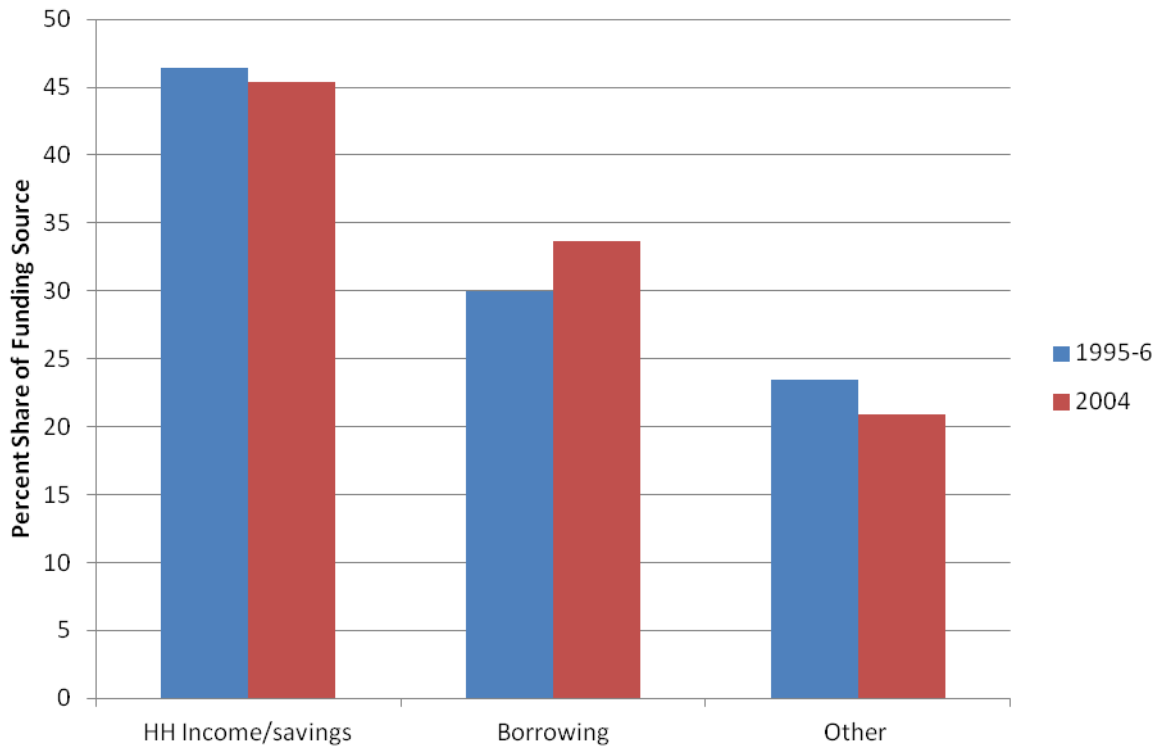

*Source:* Author estimates using National Sample Survey Data for 1995-96 and 2004. \*Other includes reimbursement, contributions from family, friends, and sales of assets
